# Supplementary material for: Photosymbiont associations persisted in planktic foraminifera during early Eocene hyperthermals at Shatsky Rise (Pacific Ocean)
Source: PLoS One. 2022 Sep 26;17(9):e0267636. doi: 10.1371/journal.pone.0267636 (PMC9512218; doi:10.1371/journal.pone.0267636)
Supplement: S1 Table — (XLSX) [file pone.0267636.s003.xlsx]

## Sheet: Sheet1
		A. soldadoensis		M. subbotinae		S. roesnaesensis
		Slope 10-3	SE 10-3	Slope 10-3	SE 10-3	Slope 10-3	SE 10-3
H2	Pre Event	1.726	0.39	2.687	0.262	0.899	0.549
	Peak Event	2.497	0.858	4.163	0.868	0.401	0.545
	Post Event	2.529	0.476	4.334	0.592	3.199	0.764
ETM2	Pre Event	2.767	0.435	4.622	0.422	0.214	0.254
	Peak Event	2.772	0.961	4.933	1.054	-0.247	1.807
	Post Event	3.671	0.764	4.488	0.694	0.307	1.849
PETM2	Pre Event	5.018	1.333	4.719	1.592	2.804	1.107
	Peak Event	2.5	1.114	4.187	1.103	-0.078	6.095
	Post Event	3.109	0.33	4.004	0.608	1.105	0.437
